# Supplementary material for: Screening of Compounds against Gardnerella vaginalis Biofilms
Source: PubMed Central journal article supplement (PMC4844189; doi:10.1371/journal.pone.0154086), 2016-04-25
Supplement: pone.0154086.s005.pdf [file pone.0154086.s005.pdf]

|                   | Abbreviation | Name                      | Company                                | Time                  | Concentration [mg/ml] | OD <sub>620nm</sub> |         |               | Mean OD <sub>620nm</sub> ± Std. dev. | Live/dead ratio |                |               | Mean live/dead ratio ± Std. dev. | Mean Viability Inhibition [%] ± Error |                |
|-------------------|--------------|---------------------------|----------------------------------------|-----------------------|-----------------------|---------------------|---------|---------------|--------------------------------------|-----------------|----------------|---------------|----------------------------------|---------------------------------------|----------------|
|                   |              |                           |                                        |                       |                       | Repl. 1             | Repl. 2 | Repl. 3       |                                      | Repl. 1         | Repl. 2        | Repl. 3       |                                  |                                       |                |
| Antiseptics       | CLC          | Chlorocresol              | Clariant GmbH                          | 20 h                  | 0                     | 1,034               | 0,979   | 0,977         | 0,997 ± 0,032                        | 10,881          | 10,889         | 11,241        | 11,004 ± 0,206                   | *                                     |                |
|                   |              |                           |                                        |                       | 0.1                   | 0,421               | 0,417   | 0,376         | 0,405 ± 0,025                        | 20,020          | 19,030         | 21,081        | 20,044 ± 1,026                   | 0,000 ± 9,923                         |                |
|                   |              |                           |                                        |                       | 0.5                   | 0,000               | 0,003   | 0,004         | 0,002 ± 0,002                        | 1,650           | 1,356          | 1,253         | 1,420 ± 0,206                    | 87,095 ± 1,886                        |                |
|                   |              |                           |                                        | 1                     | 0,001                 | 0,000               | 0,002   | 0,001 ± 0,001 | 1,299                                | 1,380           | 1,327          | 1,335 ± 0,041 | 87,866 ± 0,437                   |                                       |                |
|                   |              |                           |                                        | 40 h                  | 0                     | 1,230               | 1,221   | 1,030         | 1,160 ± 0,113                        | 7,786           | 8,055          | 7,851         | 7,898 ± 0,140                    | *                                     |                |
|                   |              |                           |                                        |                       | 0.05                  | 0,994               | 1,173   | 1,192         | 1,120 ± 0,109                        | 8,554           | 7,827          | 8,520         | 8,300 ± 0,411                    | 0,000 ± 5,525                         |                |
|                   | 0.1          | 0,998                     | 1,090                                  |                       | 0,958                 | 1,015 ± 0,068       | 8,319   | 8,583         | 7,862                                | 8,255 ± 0,364   | 0,000 ± 4,975  |               |                                  |                                       |                |
|                   | CPC          | Cetylpyridinium chloride  | Fagron GmbH & Co. KG                   | 20 h                  | 0                     | 1,034               | 0,979   | 0,977         | 0,997 ± 0,032                        | 10,881          | 10,889         | 11,241        | 11,004 ± 0,206                   | *                                     |                |
|                   |              |                           |                                        |                       | 2.5 x10 <sup>-4</sup> | 1,012               | 0,889   | 0,985         | 0,962 ± 0,065                        | 11,814          | 11,175         | 10,992        | 11,327 ± 0,431                   | 0,000 ± 4,366                         |                |
|                   |              |                           |                                        |                       | 5 x10 <sup>-4</sup>   | 0,715               | 0,714   | 0,767         | 0,732 ± 0,030                        | 10,699          | 10,837         | 13,272        | 11,603 ± 1,447                   | 0,000 ± 13,297                        |                |
|                   |              |                           |                                        | 0.001                 | 0,000                 | 0,003               | 0,007   | 0,003 ± 0,004 | 1,168                                | 1,185           | 1,107          | 1,153 ± 0,041 | 89,519 ± 0,424                   |                                       |                |
|                   |              |                           |                                        | 40 h                  | 0                     | 1,071               | 1,136   | 0,961         | 1,056 ± 0,088                        | 10,564          | 10,700         | 10,646        | 10,637 ± 0,069                   | *                                     |                |
|                   |              |                           |                                        |                       | 5 x10 <sup>-4</sup>   | 0,502               | 0,542   | 0,598         | 0,547 ± 0,048                        | 8,904           | 8,061          | 5,999         | 7,655 ± 1,495                    | 28,036 ± 14,058                       |                |
|                   | 0.001        | 0,617                     | 0,537                                  |                       | 0,571                 | 0,575 ± 0,040       | 2,568   | 2,719         | 2,665                                | 2,651 ± 0,076   | 75,081 ± 0,735 |               |                                  |                                       |                |
|                   | PBI          | Polyaminopropyl biguanide | Arch Biocides Ltd.                     | 20 h                  | 0                     | 1,034               | 0,979   | 0,977         | 0,997 ± 0,032                        | 10,881          | 10,889         | 11,241        | 11,004 ± 0,206                   | *                                     |                |
|                   |              |                           |                                        |                       | 0.01                  | 0,002               | 0,003   | 0,033         | 0,013 ± 0,018                        | 6,984           | 5,123          | 6,411         | 6,173 ± 0,953                    | 43,902 ± 8,724                        |                |
|                   |              |                           |                                        |                       | 0.05                  | 0,003               | 0,003   | 0,003         | 0,003 ± 0,000                        | 1,638           | 1,494          | 2,002         | 1,711 ± 0,262                    | 84,449 ± 2,395                        |                |
|                   |              |                           |                                        | 0.1                   | 0,000                 | 0,012               | 0,000   | 0,004 ± 0,007 | 1,451                                | 1,310           | 1,480          | 1,414 ± 0,091 | 87,151 ± 0,859                   |                                       |                |
| 40 h              |              |                           |                                        | 0                     | 1,500                 | 1,495               | 1,251   | 1,415 ± 0,142 | 6,292                                | 6,139           | 6,232          | 6,221 ± 0,077 | *                                |                                       |                |
|                   |              |                           |                                        | 0.01                  | 1,409                 | 1,360               | 1,439   | 1,403 ± 0,040 | 5,092                                | 6,181           | 5,798          | 5,691 ± 0,553 | 8,532 ± 8,955                    |                                       |                |
|                   | 0.1          | 1,074                     | 1,014                                  | 1,124                 | 1,071 ± 0,055         | 7,035               | 6,413   | 7,262         | 6,903 ± 0,439                        | 0,000 ± 7,195   |                |               |                                  |                                       |                |
| Enzymes/ Peptides | OP1          | OP-145                    | OctoPlus N.V.                          | 20 h                  | 0                     | 0,931               | 0,892   | 0,973         | 0,932 ± 0,041                        | 10,359          | 10,647         | 10,511        | 10,506 ± 0,144                   | *                                     |                |
|                   |              |                           |                                        |                       | 0.001                 | 0,920               | 0,907   | 0,950         | 0,926 ± 0,022                        | 12,256          | 10,674         | 10,183        | 11,038 ± 1,084                   | 0,000 ± 10,414                        |                |
|                   |              |                           |                                        |                       | 0.01                  | 1,003               | 0,966   | 1,048         | 1,006 ± 0,041                        | 13,447          | 12,836         | 11,727        | 12,670 ± 0,872                   | 0,000 ± 8,464                         |                |
|                   |              |                           |                                        | 0.1                   | 0,198                 | 0,202               | 0,206   | 0,202 ± 0,004 | 1,237                                | 1,371           | 1,431          | 1,346 ± 0,100 | 87,184 ± 0,964                   |                                       |                |
|                   |              |                           |                                        | 40 h                  | 0                     | 1,448               | 1,512   | 1,502         | 1,487 ± 0,034                        | 9,184           | 9,259          | 9,399         | 9,281 ± 0,109                    | *                                     |                |
|                   |              |                           |                                        |                       | 0.001                 | 1,436               | 1,468   | 1,543         | 1,482 ± 0,055                        | 8,807           | 9,293          | 9,375         | 9,158 ± 0,307                    | 1,320 ± 3,504                         |                |
|                   | 0.01         | 1,346                     | 1,468                                  |                       | 1,364                 | 1,393 ± 0,066       | 8,939   | 9,367         | 10,031                               | 9,446 ± 0,550   | 0,000 ± 6,930  |               |                                  |                                       |                |
|                   | LYS          | Lysozyme                  | Biozym GmbH                            | 20 h                  | 0                     | 0,935               | 0,980   | 0,985         | 0,967 ± 0,028                        | 11,198          | 11,080         | 11,423        | 11,234 ± 0,174                   | *                                     |                |
|                   |              |                           |                                        |                       | 0.01                  | 1,031               | 1,019   | 1,058         | 1,036 ± 0,020                        | 10,955          | 10,899         | 11,885        | 11,246 ± 0,554                   | 0,000 ± 5,170                         |                |
|                   |              |                           |                                        |                       | 0.1                   | 0,864               | 0,945   | 0,843         | 0,884 ± 0,054                        | 9,162           | 9,013          | 7,144         | 8,440 ± 1,125                    | 24,871 ± 10,078                       |                |
|                   |              |                           |                                        | 0.5                   | 0,018                 | 0,011               | 0,019   | 0,016 ± 0,004 | 1,445                                | 1,265           | 1,462          | 1,390 ± 0,109 | 87,622 ± 0,991                   |                                       |                |
|                   |              |                           |                                        | 40 h                  | 0                     | 1,230               | 1,221   | 1,030         | 1,160 ± 0,113                        | 7,786           | 8,055          | 7,851         | 7,898 ± 0,140                    | *                                     |                |
|                   |              |                           |                                        |                       | 0.5                   | 1,349               | 1,571   | 1,388         | 1,436 ± 0,119                        | 4,141           | 4,779          | 4,376         | 4,432 ± 0,322                    | 43,881 ± 4,203                        |                |
|                   | 2.5          | 0,809                     | 1,117                                  |                       | 1,095                 | 1,007 ± 0,172       | 4,053   | 3,861         | 4,025                                | 3,980 ± 0,103   | 49,607 ± 1,587 |               |                                  |                                       |                |
|                   | PRO          | Proteinase K              | Fermentas GmbH                         | 20 h                  | 0                     | 1,034               | 0,979   | 0,977         | 0,997 ± 0,032                        | 10,881          | 10,889         | 11,241        | 11,004 ± 0,206                   | *                                     |                |
|                   |              |                           |                                        |                       | 0.004                 | 0,712               | 0,515   | 0,089         | 0,439 ± 0,318                        | 11,932          | 12,709         | 12,516        | 12,386 ± 0,405                   | 0,000 ± 4,239                         |                |
|                   |              |                           |                                        |                       | 0.02                  | 0,015               | 0,080   | 0,030         | 0,042 ± 0,034                        | 20,175          | 16,850         | 17,500        | 18,175 ± 1,762                   | 0,000 ± 15,015                        |                |
|                   |              |                           |                                        | 0.1                   | 0,006                 | 0,008               | 0,053   | 0,022 ± 0,027 | 7,296                                | 1,897           | 2,800          | 3,998 ± 2,892 | 63,669 ± 16,055                  |                                       |                |
| 40 h              |              |                           |                                        | 0                     | 1,500                 | 1,495               | 1,251   | 1,415 ± 0,142 | 6,292                                | 6,139           | 6,232          | 6,221 ± 0,077 | *                                |                                       |                |
|                   |              |                           |                                        | 0.008                 | 1,231                 | 1,236               | 1,096   | 1,188 ± 0,079 | 6,958                                | 6,962           | 7,916          | 7,279 ± 0,552 | 0,000 ± 8,990                    |                                       |                |
|                   | 0.04         | 1,202                     | 1,357                                  | 1,232                 | 1,264 ± 0,082         | 9,177               | 7,823   | 8,378         | 8,459 ± 0,680                        | 0,000 ± 11,062  |                |               |                                  |                                       |                |
| Antibiotics       | TOB          | Tobramycin sulfate        | Zhejiang Hisun Pharmaceutical Co. Ltd. | 20 h                  | 0                     | 0,935               | 0,980   | 0,985         | 0,967 ± 0,028                        | 11,198          | 11,080         | 11,423        | 11,234 ± 0,174                   | *                                     |                |
|                   |              |                           |                                        |                       | 0.01                  | 0,717               | 0,735   | 0,752         | 0,735 ± 0,018                        | 19,606          | 13,905         | 15,237        | 16,249 ± 2,982                   | 0,000 ± 26,641                        |                |
|                   |              |                           |                                        |                       | 0.1                   | 0,006               | 0,003   | 0,005         | 0,005 ± 0,002                        | 1,565           | 1,497          | 1,505         | 1,522 ± 0,037                    | 86,448 ± 0,390                        |                |
|                   |              |                           |                                        | 1                     | 0,001                 | 0,004               | 0,001   | 0,002 ± 0,002 | 1,244                                | 1,190           | 1,265          | 1,233 ± 0,039 | 89,026 ± 0,385                   |                                       |                |
|                   |              |                           |                                        | 40 h                  | 0                     | 1,230               | 1,221   | 1,030         | 1,160 ± 0,113                        | 7,786           | 8,055          | 7,851         | 7,898 ± 0,140                    | *                                     |                |
|                   |              |                           |                                        |                       | 1                     | 0,700               | 0,712   | 0,727         | 0,713 ± 0,014                        | 7,629           | 7,864          | 9,322         | 8,271 ± 0,917                    | 0,000 ± 11,764                        |                |
|                   | 5            | 0,661                     | 0,783                                  |                       | 0,654                 | 0,699 ± 0,073       | 10,054  | 9,933         | 10,040                               | 10,009 ± 0,066  | 0,000 ± 2,405  |               |                                  |                                       |                |
|                   | MET          | Metronidazole             | Biesterfeld Spezialchemie GmbH         | 20 h                  | 0                     | 0,931               | 0,892   | 0,973         | 0,932 ± 0,041                        | 10,359          | 10,647         | 10,511        | 10,506 ± 0,144                   | *                                     |                |
|                   |              |                           |                                        |                       | 0.01                  | 0,442               | 0,494   | 0,455         | 0,464 ± 0,027                        | 17,187          | 14,204         | 14,968        | 15,453 ± 1,549                   | 0,000 ± 14,884                        |                |
|                   |              |                           |                                        |                       | 0.1                   | 0,003               | 0,002   | 0,002         | 0,002 ± 0,001                        | 1,896           | 1,833          | 1,756         | 1,828 ± 0,070                    | 82,597 ± 0,707                        |                |
|                   |              |                           |                                        | 1                     | 0,002                 | 0,008               | 0,000   | 0,003 ± 0,004 | 1,737                                | 1,666           | 1,827          | 1,743 ± 0,081 | 83,405 ± 0,802                   |                                       |                |
|                   |              |                           |                                        | 40 h                  | 0                     | 1,448               | 1,512   | 1,502         | 1,487 ± 0,034                        | 9,298           | 9,259          | 9,289         | 9,282 ± 0,020                    | *                                     |                |
|                   |              |                           |                                        |                       | 0.01                  | 1,338               | 1,332   | 1,266         | 1,312 ± 0,040                        | 7,715           | 7,123          | 6,802         | 7,213 ± 0,463                    | 22,287 ± 4,993                        |                |
|                   | 0.1          | 0,776                     | 0,892                                  |                       | 0,730                 | 0,799 ± 0,083       | 8,600   | 9,004         | 9,358                                | 8,987 ± 0,379   | 3,179 ± 4,087  |               |                                  |                                       |                |
|                   | Tensides     | LEC                       | Lecithin                               | Cargill GmbH & Co. KG | 20 h                  | 0                   | 0,510   | 0,473         | 0,469                                | 0,484 ± 0,023   | 10,881         | 10,889        | 11,241                           | 11,004 ± 0,206                        | *              |
|                   |              |                           |                                        |                       |                       | 12.5                | 0,067   | 0,092         | 0,120                                | 0,093 ± 0,027   | 12,190         | 13,984        | 11,299                           | 12,491 ± 1,368                        | 0,000 ± 12,610 |
|                   |              |                           |                                        |                       |                       | 25                  | 0,177   | 0,111         | 0,162                                | 0,150 ± 0,035   | 4,954          | 4,503         | 4,561                            | 4,673 ± 0,245                         | 49,658 ± 2,366 |
|                   |              |                           |                                        |                       | 50                    | 0,329               | 0,406   | 0,620         | 0,452 ± 0,151                        | 10,582          | 10,966         | 11,296        | 10,948 ± 0,357                   | 0,000 ± 3,741                         |                |
| 40 h              |              |                           |                                        |                       | 0                     | 1,071               | 1,136   | 0,961         | 1,056 ± 0,088                        | 10,564          | 10,700         | 10,646        | 10,637 ± 0,069                   | *                                     |                |
|                   |              |                           |                                        |                       | 12.5                  | 1,112               | 1,171   | 1,370         | 1,218 ± 0,135                        | 17,508          | 16,980         | 18,373        | 17,620 ± 0,703                   | 0,000 ± 6,696                         |                |
|                   |              | 25                        | 0,875                                  | 1,235                 | 1,218                 | 1,109 ± 0,203       | 16,770  | 13,130        | 12,647                               | 14,182 ± 2,254  | 0,000 ± 21,206 |               |                                  |                                       |                |
| SCAA              |              | Sodium cocoamphoacetate   | C.H. Erbslöh KG                        | 20 h                  | 0                     | 0,935               | 0,980   | 0,985         | 0,967 ± 0,028                        | 11,198          | 11,080         | 11,423        | 11,234 ± 0,174                   | *                                     |                |
|                   |              |                           |                                        |                       | 0.25                  | 0,010               | 0,004   | 0,002         | 0,005 ± 0,004                        | 1,281           | 1,416          | 1,205         | 1,301 ± 0,107                    | 88,423 ± 0,966                        |                |
|                   |              |                           |                                        |                       | 0.5                   | 0,000               | 0,003   | 0,004         | 0,002 ± 0,002                        | 1,244           | 1,114          | 1,345         | 1,234 ± 0,115                    | 89,012 ± 1,041                        |                |
|                   |              |                           |                                        | 1                     | 0,005                 | 0,001               | 0,027   | 0,011 ± 0,014 | 1,055                                | 1,026           | 0,959          | 1,013 ± 0,049 | 90,981 ± 0,462                   |                                       |                |
|                   |              |                           |                                        | 40 h                  | 0                     | 1,230               | 1,221   | 1,030         | 1,160 ± 0,113                        | 7,786           | 8,055          | 7,851         | 7,898 ± 0,140                    | *                                     |                |
|                   | 0.01         |                           |                                        |                       | 1,146                 | 1,273               | 1,221   | 1,213 ± 0,064 | 6,902                                | 7,213           | 7,033          | 7,049 ± 0,156 | 10,739 ± 2,533                   |                                       |                |
| 0.1               | 1,031        | 1,310                     | 1,336                                  |                       | 1,226 ± 0,169         | 7,668               | 11,999  | 8,143         | 9,270 ± 2,375                        | 0,000 ± 30,147  |                |               |                                  |                                       |                |
| 1                 | 0,464        | 0,469                     | 0,490                                  | 0,474 ± 0,014         | 3,231                 | 3,083               | 3,032   | 3,115 ± 0,103 | 60,555 ± 1,482                       |                 |                |               |                                  |                                       |                |

\* Viability inhibition values are dependent on the control

**Table S1:** Summary of all compounds including abbreviations, providers, tested concentrations and the effect on OD<sub>620nm</sub> and live/dead ratio. Biofilm viability inhibition [%] was calculated based on the live/dead ratio.
